# Supplementary material
Source: PubMed Central journal article supplement (PMC6290917)
Supplement: NIHMS992910-supplement-appendix_B.pdf [file NIHMS992910-supplement-appendix_B.pdf]

## Appendix B. Additional Tables for Simulation Results

Tables showing the coefficients used for generating missing data B.6 and the power of the Wald test for testing  $H_0 : \beta_1 = 0$  are provided below (See Table B.7 to B.11).

Table B.6: Parameters for simulation study

| Method                   | $\gamma_0$ | $\gamma_1$ | $\gamma_2$ | $\gamma_3$ | $\gamma_4$ | $\gamma_5$ | $\gamma_6$ |
|--------------------------|------------|------------|------------|------------|------------|------------|------------|
| <b>10% missing data</b>  |            |            |            |            |            |            |            |
| MCAR $\mathcal{L}$       | -2.2       | 0.0        | 0.0        | 0.0        | 0.0        | 0.0        | 0.0        |
| MAR(Y) $\#$              | -3.4       | 0.0        | 0.0        | 0.0        | 0.0        | 0.0        | 1.8        |
| MAR(X2) <sup>b</sup>     | -3.4       | 0.0        | 0.8        | 0.0        | 0.0        | 0.0        | 0.0        |
| MAR(Y,X2) <sup>†</sup>   | -3.5       | 0.0        | 1.2        | 0.0        | 0.0        | 0.0        | -0.6       |
| MNAR(X1) <sup>‡</sup>    | -3.4       | 0.8        | 0.0        | 0.0        | 0.0        | 0.0        | 0.0        |
| MNAR(X1,X2) <sup>‡</sup> | -3.4       | 0.4        | 0.4        | 0.0        | 0.0        | 0.0        | 0.0        |
| MNAR(X1,Y) <sup>§</sup>  | -3.4       | 1.2        | 0.0        | 0.0        | 0.0        | 0.0        | -0.6       |
| <b>30% missing data</b>  |            |            |            |            |            |            |            |
| MCAR $\mathcal{L}$       | -0.9       | 0.0        | 0.0        | 0.0        | 0.0        | 0.0        | 0.0        |
| MAR(Y) $\#$              | -1.9       | 0.0        | 0.0        | 0.0        | 0.0        | 0.0        | 1.8        |
| MAR(X2) <sup>b</sup>     | -2.0       | 0.0        | 0.8        | 0.0        | 0.0        | 0.0        | 0.0        |
| MAR(Y,X2) <sup>†</sup>   | -2.2       | 0.0        | 0.8        | 0.0        | 0.0        | 0.0        | 0.8        |
| MNAR(X1) <sup>‡</sup>    | -2.0       | 0.8        | 0.0        | 0.0        | 0.0        | 0.0        | 0.0        |
| MNAR(X1,X2) <sup>‡</sup> | -2.0       | 0.4        | 0.4        | 0.0        | 0.0        | 0.0        | 0.0        |
| MNAR(X1,Y) <sup>§</sup>  | -2.4       | 0.8        | 0.0        | 0.0        | 0.0        | 0.0        | 0.8        |

$\mathcal{L}$  missing completely at random  
 $\#$  missing at random conditional on  $Y$   
 $b$  missing at random conditional on  $X2$   
 $†$  missing at random conditional on  $Y, X2$   
 $‡$  missing not at random conditional on  $X1$   
 $‡$  missing not at random conditional on  $X1, X2$   
 $§$  missing not at random conditional on  $X1, Y$

Table B.7: Power of Wald test for testing  $H_0 : \beta_1 = 0$ , where  $\beta_1=0.69$ ,  $\beta_2=0$ ,  $pr(X_1 = 1) = 0.5$ ,  $n=200$ , 1000 simulations.

| Pr(Miss)                                             |                            | CCA   | MI    | EM    | LLMI  | LCMI-2 | LCMI-3 |
|------------------------------------------------------|----------------------------|-------|-------|-------|-------|--------|--------|
| 10%                                                  | MCAR <sup><i>a</i></sup>   | 0.750 | 0.780 | 0.820 | 0.780 | 0.790  | 0.810  |
|                                                      | MAR(Y) <sup><i>b</i></sup> | 0.750 | 0.780 | 0.810 | 0.780 | 0.780  | 0.820  |
|                                                      | MAR(X2) <sup>b</sup>       | 0.750 | 0.800 | 0.820 | 0.800 | 0.790  | 0.830  |
|                                                      | MAR(Y,X2) <sup>†</sup>     | 0.740 | 0.770 | 0.800 | 0.770 | 0.790  | 0.820  |
|                                                      | MNAR(X1) <sup>‡</sup>      | 0.750 | 0.800 | 0.800 | 0.800 | 0.810  | 0.810  |
|                                                      | MNAR(X1,X2) <sup>‡</sup>   | 0.740 | 0.790 | 0.820 | 0.790 | 0.800  | 0.820  |
|                                                      | MNAR(X1,Y) <sup>§</sup>    | 0.780 | 0.820 | 0.840 | 0.820 | 0.820  | 0.830  |
| 30%                                                  | MCAR <sup><i>a</i></sup>   | 0.510 | 0.660 | 0.750 | 0.660 | 0.700  | 0.740  |
|                                                      | MAR(Y) <sup><i>b</i></sup> | 0.470 | 0.650 | 0.740 | 0.650 | 0.650  | 0.720  |
|                                                      | MAR(X2) <sup>b</sup>       | 0.480 | 0.670 | 0.780 | 0.670 | 0.660  | 0.740  |
|                                                      | MAR(Y,X2) <sup>†</sup>     | 0.550 | 0.660 | 0.760 | 0.660 | 0.660  | 0.720  |
|                                                      | MNAR(X1) <sup>‡</sup>      | 0.530 | 0.640 | 0.750 | 0.640 | 0.660  | 0.740  |
|                                                      | MNAR(X1,X2) <sup>‡</sup>   | 0.520 | 0.670 | 0.760 | 0.670 | 0.670  | 0.730  |
|                                                      | MNAR(X1,Y) <sup>§</sup>    | 0.340 | 0.470 | 0.600 | 0.470 | 0.470  | 0.690  |
| 50%                                                  | MCAR <sup><i>a</i></sup>   | 0.270 | 0.500 | 0.730 | 0.500 | 0.500  | 0.640  |
|                                                      | MAR(Y) <sup><i>b</i></sup> | 0.320 | 0.520 | 0.740 | 0.520 | 0.550  | 0.670  |
|                                                      | MAR(X2) <sup>b</sup>       | 0.210 | 0.470 | 0.680 | 0.470 | 0.480  | 0.610  |
|                                                      | MAR(Y,X2) <sup>†</sup>     | 0.300 | 0.520 | 0.700 | 0.520 | 0.520  | 0.660  |
|                                                      | MNAR(X1) <sup>‡</sup>      | 0.310 | 0.490 | 0.680 | 0.490 | 0.490  | 0.610  |
|                                                      | MNAR(X1,X2) <sup>‡</sup>   | 0.310 | 0.500 | 0.730 | 0.500 | 0.560  | 0.650  |
|                                                      | MNAR(X1,Y) <sup>§</sup>    | 0.180 | 0.360 | 0.560 | 0.360 | 0.340  | 0.570  |
| <i>a</i> missing completely at random                |                            |       |       |       |       |        |        |
| <i>b</i> missing at random conditional on Y          |                            |       |       |       |       |        |        |
| <i>b</i> missing at random conditional on X2         |                            |       |       |       |       |        |        |
| <i>†</i> missing at random conditional on Y, X2      |                            |       |       |       |       |        |        |
| <i>‡</i> missing not at random conditional on X1     |                            |       |       |       |       |        |        |
| <i>‡</i> missing not at random conditional on X1, X2 |                            |       |       |       |       |        |        |
| <i>§</i> missing not at random conditional on X1, Y  |                            |       |       |       |       |        |        |

Table B.8: Estimates of  $\hat{\beta}_1$  and its standard error (when  $\beta_1 = 0$ ) for 1:1 matched study with  $n=200$ ,  $pr(X_1 = 1) = 0.5$  and  $pr(X_2 = 1) = 0.5$ , 1000 simulations.

|                        | CCA   |       | MI    |       | EM    |       | LLMI  |       | LCMI-2 |       | LCMI-3 |       |
|------------------------|-------|-------|-------|-------|-------|-------|-------|-------|--------|-------|--------|-------|
|                        | beta  | ASE   | beta  | ASE   | beta  | ASE   | beta  | ASE   | beta   | ASE   | beta   | ASE   |
| Pr(Missing)=10%        |       |       |       |       |       |       |       |       |        |       |        |       |
| MCAR $\mathcal{L}$     | 0.008 | 0.284 | 0.005 | 0.270 | 0.002 | 0.254 | 0.005 | 0.270 | 0.002  | 0.269 | 0.001  | 0.261 |
| MAR(Y) $\#$            | 0.013 | 0.285 | 0.005 | 0.271 | 0.002 | 0.253 | 0.005 | 0.271 | 0.004  | 0.268 | 0.002  | 0.260 |
| MAR(X2) $\flat$        | 0.004 | 0.284 | 0.004 | 0.271 | 0.010 | 0.254 | 0.004 | 0.271 | 0.002  | 0.269 | 0.002  | 0.262 |
| MAR(Y,X2) $\dagger$    | 0.003 | 0.291 | 0.002 | 0.274 | 0.004 | 0.253 | 0.002 | 0.274 | 0.003  | 0.271 | 0.000  | 0.262 |
| MNAR(X1) $\ddagger$    | 0.005 | 0.284 | 0.000 | 0.273 | 0.001 | 0.258 | 0.000 | 0.273 | 0.001  | 0.273 | 0.002  | 0.262 |
| MNAR(X1,X2) $\natural$ | 0.000 | 0.283 | 0.002 | 0.270 | 0.001 | 0.256 | 0.002 | 0.270 | 0.003  | 0.271 | 0.002  | 0.261 |
| MNAR(X1,Y) $\S$        | 0.033 | 0.288 | 0.029 | 0.276 | 0.035 | 0.260 | 0.029 | 0.276 | 0.034  | 0.275 | 0.012  | 0.263 |
| Pr(Missing)=30%        |       |       |       |       |       |       |       |       |        |       |        |       |
| MCAR $\mathcal{L}$     | 0.036 | 0.374 | 0.016 | 0.316 | 0.010 | 0.255 | 0.016 | 0.316 | 0.006  | 0.306 | 0.003  | 0.282 |
| MAR(Y) $\#$            | 0.001 | 0.383 | 0.009 | 0.318 | 0.012 | 0.253 | 0.009 | 0.318 | 0.003  | 0.310 | 0.004  | 0.280 |
| MAR(X2) $\flat$        | 0.003 | 0.389 | 0.007 | 0.324 | 0.010 | 0.254 | 0.007 | 0.324 | 0.002  | 0.317 | 0.004  | 0.289 |
| MAR(Y,X2) $\dagger$    | 0.008 | 0.389 | 0.007 | 0.322 | 0.010 | 0.254 | 0.007 | 0.322 | 0.024  | 0.312 | 0.014  | 0.284 |
| MNAR(X1) $\ddagger$    | 0.012 | 0.382 | 0.006 | 0.330 | 0.004 | 0.271 | 0.006 | 0.330 | 0.001  | 0.325 | 0.002  | 0.286 |
| MNAR(X1,X2) $\natural$ | 0.006 | 0.379 | 0.005 | 0.318 | 0.008 | 0.262 | 0.005 | 0.318 | 0.003  | 0.317 | 0.008  | 0.281 |
| MNAR(X1,Y) $\S$        | 0.137 | 0.393 | 0.141 | 0.335 | 0.133 | 0.272 | 0.141 | 0.335 | 0.134  | 0.328 | 0.043  | 0.289 |
| Pr(Missing)=50%        |       |       |       |       |       |       |       |       |        |       |        |       |
| MCAR $\mathcal{L}$     | 0.000 | 0.570 | 0.000 | 0.390 | 0.010 | 0.260 | 0.000 | 0.390 | 0.010  | 0.370 | 0.000  | 0.320 |
| MAR(Y) $\#$            | 0.020 | 0.560 | 0.000 | 0.380 | 0.010 | 0.260 | 0.000 | 0.380 | 0.010  | 0.370 | 0.010  | 0.310 |
| MAR(X2) $\flat$        | 0.010 | 0.650 | 0.010 | 0.420 | 0.000 | 0.260 | 0.010 | 0.420 | 0.010  | 0.430 | 0.000  | 0.350 |
| MAR(Y,X2) $\dagger$    | 0.020 | 0.570 | 0.020 | 0.380 | 0.010 | 0.260 | 0.020 | 0.380 | 0.010  | 0.370 | 0.020  | 0.310 |
| MNAR(X1) $\ddagger$    | 0.020 | 0.560 | 0.000 | 0.410 | 0.000 | 0.290 | 0.000 | 0.410 | 0.010  | 0.400 | 0.010  | 0.320 |
| MNAR(X1,X2) $\natural$ | 0.020 | 0.560 | 0.010 | 0.390 | 0.010 | 0.270 | 0.010 | 0.390 | 0.000  | 0.380 | 0.000  | 0.310 |
| MNAR(X1,Y) $\S$        | 0.140 | 0.580 | 0.150 | 0.420 | 0.180 | 0.290 | 0.150 | 0.420 | 0.160  | 0.420 | 0.050  | 0.330 |

$\mathcal{L}$  missing completely at random

$\#$  missing at random conditional on Y

$\flat$  missing at random conditional on X2

$\dagger$  missing at random conditional on Y, X2

$\ddagger$  missing not at random conditional on X1

$\natural$  missing not at random conditional on X1, X2

$\S$  missing not at random conditional on X1, Y

Table B.9: Estimates of  $\hat{\beta}_1$  and its standard error (when  $\beta_1 = 0.69$ ) for 1:1 matched study with  $n=200$ ,  $pr(X_1 = 1) = 0.5$  and  $pr(X_2 = 1) = 0.5$ , 1000 simulations.

|                             | CCA   |       | MI    |       | EM    |       | LLMI  |       | LCMI-2 |       | LCMI-3 |       |
|-----------------------------|-------|-------|-------|-------|-------|-------|-------|-------|--------|-------|--------|-------|
|                             | beta  | ASE   | beta  | ASE   | beta  | ASE   | beta  | ASE   | beta   | ASE   | beta   | ASE   |
| Pr(Missing)=10%             |       |       |       |       |       |       |       |       |        |       |        |       |
| MCAR <sup><i>ℒ</i></sup>    | 0.720 | 0.280 | 0.720 | 0.270 | 0.720 | 0.250 | 0.720 | 0.270 | 0.710  | 0.260 | 0.720  | 0.260 |
| MAR(Y) <sup>#</sup>         | 0.720 | 0.280 | 0.710 | 0.270 | 0.710 | 0.250 | 0.710 | 0.270 | 0.710  | 0.270 | 0.710  | 0.260 |
| MAR(X2) <sup><i>b</i></sup> | 0.720 | 0.280 | 0.720 | 0.270 | 0.710 | 0.250 | 0.720 | 0.270 | 0.710  | 0.260 | 0.710  | 0.260 |
| MAR(Y,X2) <sup>†</sup>      | 0.720 | 0.290 | 0.710 | 0.270 | 0.710 | 0.250 | 0.710 | 0.270 | 0.720  | 0.270 | 0.720  | 0.260 |
| MNAR(X1) <sup>‡</sup>       | 0.720 | 0.280 | 0.710 | 0.270 | 0.710 | 0.250 | 0.710 | 0.270 | 0.720  | 0.270 | 0.710  | 0.260 |
| MNAR(X1,X2) <sup>‡</sup>    | 0.720 | 0.280 | 0.720 | 0.270 | 0.720 | 0.250 | 0.720 | 0.270 | 0.720  | 0.260 | 0.720  | 0.260 |
| MNAR(X1,Y) <sup>§</sup>     | 0.740 | 0.280 | 0.750 | 0.270 | 0.750 | 0.250 | 0.750 | 0.270 | 0.740  | 0.270 | 0.730  | 0.260 |
| Pr(Missing)=30%             |       |       |       |       |       |       |       |       |        |       |        |       |
| MCAR <sup><i>ℒ</i></sup>    | 0.720 | 0.370 | 0.720 | 0.310 | 0.710 | 0.250 | 0.720 | 0.310 | 0.720  | 0.300 | 0.720  | 0.280 |
| MAR(Y) <sup>#</sup>         | 0.740 | 0.380 | 0.710 | 0.310 | 0.710 | 0.250 | 0.710 | 0.310 | 0.700  | 0.310 | 0.710  | 0.280 |
| MAR(X2) <sup><i>b</i></sup> | 0.730 | 0.380 | 0.720 | 0.310 | 0.740 | 0.250 | 0.720 | 0.310 | 0.710  | 0.310 | 0.720  | 0.280 |
| MAR(Y,X2) <sup>†</sup>      | 0.750 | 0.380 | 0.710 | 0.310 | 0.710 | 0.250 | 0.710 | 0.310 | 0.700  | 0.310 | 0.700  | 0.280 |
| MNAR(X1) <sup>‡</sup>       | 0.750 | 0.380 | 0.730 | 0.320 | 0.720 | 0.260 | 0.730 | 0.320 | 0.720  | 0.310 | 0.720  | 0.280 |
| MNAR(X1,X2) <sup>‡</sup>    | 0.740 | 0.370 | 0.720 | 0.320 | 0.720 | 0.260 | 0.720 | 0.320 | 0.730  | 0.310 | 0.710  | 0.280 |
| MNAR(X1,Y) <sup>§</sup>     | 0.610 | 0.380 | 0.590 | 0.320 | 0.600 | 0.260 | 0.590 | 0.320 | 0.590  | 0.310 | 0.670  | 0.280 |
| Pr(Missing)=50%             |       |       |       |       |       |       |       |       |        |       |        |       |
| MCAR <sup><i>ℒ</i></sup>    | 0.760 | 0.560 | 0.730 | 0.380 | 0.750 | 0.260 | 0.730 | 0.380 | 0.710  | 0.370 | 0.720  | 0.320 |
| MAR(Y) <sup>#</sup>         | 0.800 | 0.560 | 0.720 | 0.370 | 0.720 | 0.250 | 0.720 | 0.370 | 0.710  | 0.360 | 0.710  | 0.310 |
| MAR(X2) <sup><i>b</i></sup> | 0.810 | 0.650 | 0.720 | 0.400 | 0.750 | 0.260 | 0.720 | 0.400 | 0.690  | 0.390 | 0.720  | 0.340 |
| MAR(Y,X2) <sup>†</sup>      | 0.830 | 0.570 | 0.720 | 0.380 | 0.740 | 0.260 | 0.720 | 0.380 | 0.710  | 0.360 | 0.710  | 0.310 |
| MNAR(X1) <sup>‡</sup>       | 0.830 | 0.560 | 0.730 | 0.390 | 0.740 | 0.270 | 0.730 | 0.390 | 0.730  | 0.380 | 0.710  | 0.320 |
| MNAR(X1,X2) <sup>‡</sup>    | 0.800 | 0.550 | 0.730 | 0.380 | 0.740 | 0.260 | 0.730 | 0.380 | 0.730  | 0.360 | 0.710  | 0.310 |
| MNAR(X1,Y) <sup>§</sup>     | 0.640 | 0.570 | 0.570 | 0.390 | 0.580 | 0.270 | 0.570 | 0.390 | 0.560  | 0.390 | 0.670  | 0.320 |

<sup>*ℒ*</sup> missing completely at random  
<sup>#</sup> missing at random conditional on Y  
<sup>*b*</sup> missing at random conditional on X2  
<sup>†</sup> missing at random conditional on Y, X2  
<sup>‡</sup> missing not at random conditional on X1  
<sup>‡</sup> missing not at random conditional on X1, X2  
<sup>§</sup> missing not at random conditional on X1, Y

Table B.10: Estimates of  $\hat{\beta}_2$  and its standard error (when  $\beta_2 = 0$ ) for 1:1 matched study with  $n=200$ ,  $pr(X_1 = 1) = 0.5$  and  $pr(X_2 = 1) = 0.5$ , 1000 simulations.

|                         | CCA   |       | MI    |       | EM    |       | LLMI  |       | LCMI-2 |       | LCMI-3 |       |
|-------------------------|-------|-------|-------|-------|-------|-------|-------|-------|--------|-------|--------|-------|
|                         | beta  | ASE   | beta  | ASE   | beta  | ASE   | beta  | ASE   | beta   | ASE   | beta   | ASE   |
| Pr(Missing)=10%         |       |       |       |       |       |       |       |       |        |       |        |       |
| MCAR $\mathcal{L}$      | 0.004 | 0.155 | 0.001 | 0.140 | 0.000 | 0.138 | 0.001 | 0.140 | 0.000  | 0.139 | 0.000  | 0.139 |
| MAR(Y) $\#$             | 0.000 | 0.156 | 0.001 | 0.140 | 0.000 | 0.138 | 0.001 | 0.140 | 0.001  | 0.139 | 0.000  | 0.139 |
| MAR(X2) $^b$            | 0.000 | 0.155 | 0.001 | 0.140 | 0.002 | 0.138 | 0.001 | 0.140 | 0.000  | 0.139 | 0.000  | 0.139 |
| MAR(Y,X2) $^\dagger$    | 0.003 | 0.160 | 0.001 | 0.140 | 0.001 | 0.138 | 0.001 | 0.140 | 0.001  | 0.139 | 0.000  | 0.139 |
| MNAR(X1) $^\ddagger$    | 0.003 | 0.152 | 0.000 | 0.139 | 0.000 | 0.138 | 0.000 | 0.139 | 0.000  | 0.139 | 0.001  | 0.139 |
| MNAR(X1,X2) $^\natural$ | 0.003 | 0.153 | 0.001 | 0.139 | 0.000 | 0.138 | 0.001 | 0.139 | 0.001  | 0.139 | 0.001  | 0.139 |
| MNAR(X1,Y) $^\S$        | 0.004 | 0.152 | 0.005 | 0.139 | 0.006 | 0.138 | 0.005 | 0.139 | 0.006  | 0.139 | 0.002  | 0.139 |
| Pr(Missing)=30%         |       |       |       |       |       |       |       |       |        |       |        |       |
| MCAR $\mathcal{L}$      | 0.009 | 0.205 | 0.003 | 0.143 | 0.001 | 0.139 | 0.003 | 0.143 | 0.001  | 0.141 | 0.000  | 0.140 |
| MAR(Y) $\#$             | 0.014 | 0.210 | 0.001 | 0.143 | 0.002 | 0.138 | 0.001 | 0.143 | 0.000  | 0.141 | 0.001  | 0.140 |
| MAR(X2) $^b$            | 0.010 | 0.212 | 0.003 | 0.144 | 0.001 | 0.138 | 0.003 | 0.144 | 0.002  | 0.142 | 0.001  | 0.140 |
| MAR(Y,X2) $^\dagger$    | 0.000 | 0.215 | 0.000 | 0.144 | 0.002 | 0.139 | 0.000 | 0.144 | 0.003  | 0.142 | 0.003  | 0.140 |
| MNAR(X1) $^\ddagger$    | 0.006 | 0.193 | 0.001 | 0.141 | 0.001 | 0.137 | 0.001 | 0.141 | 0.000  | 0.140 | 0.001  | 0.140 |
| MNAR(X1,X2) $^\natural$ | 0.003 | 0.199 | 0.001 | 0.142 | 0.002 | 0.138 | 0.001 | 0.142 | 0.001  | 0.141 | 0.001  | 0.140 |
| MNAR(X1,Y) $^\S$        | 0.007 | 0.197 | 0.021 | 0.141 | 0.020 | 0.137 | 0.021 | 0.141 | 0.019  | 0.140 | 0.007  | 0.140 |
| Pr(Missing)=50%         |       |       |       |       |       |       |       |       |        |       |        |       |
| MCAR $\mathcal{L}$      | 0.000 | 0.310 | 0.000 | 0.150 | 0.000 | 0.140 | 0.000 | 0.150 | 0.000  | 0.150 | 0.000  | 0.140 |
| MAR(Y) $\#$             | 0.000 | 0.310 | 0.000 | 0.150 | 0.000 | 0.140 | 0.000 | 0.150 | 0.000  | 0.150 | 0.000  | 0.140 |
| MAR(X2) $^b$            | 0.010 | 0.350 | 0.010 | 0.150 | 0.000 | 0.140 | 0.010 | 0.150 | 0.000  | 0.150 | 0.000  | 0.140 |
| MAR(Y,X2) $^\dagger$    | 0.020 | 0.320 | 0.010 | 0.150 | 0.000 | 0.140 | 0.010 | 0.150 | 0.000  | 0.150 | 0.000  | 0.140 |
| MNAR(X1) $^\ddagger$    | 0.000 | 0.270 | 0.000 | 0.140 | 0.000 | 0.140 | 0.000 | 0.140 | 0.000  | 0.140 | 0.000  | 0.140 |
| MNAR(X1,X2) $^\natural$ | 0.010 | 0.290 | 0.000 | 0.150 | 0.000 | 0.140 | 0.000 | 0.150 | 0.000  | 0.140 | 0.000  | 0.140 |
| MNAR(X1,Y) $^\S$        | 0.010 | 0.270 | 0.020 | 0.140 | 0.030 | 0.140 | 0.020 | 0.140 | 0.020  | 0.140 | 0.010  | 0.140 |

$\mathcal{L}$  missing completely at random  
 $\#$  missing at random conditional on Y  
 $^b$  missing at random conditional on X2  
 $^\dagger$  missing at random conditional on Y, X2  
 $^\ddagger$  missing not at random conditional on X1  
 $^\natural$  missing not at random conditional on X1, X2  
 $^\S$  missing not at random conditional on X1, Y

Table B.11: 95% confidence interval coverage (95CI) and Type-I error rate (TE) of Wald test for testing  $H_0 : \beta_1 = 0$ , where  $\beta_1=0.69, \beta_2=0, pr(X_1 = 1) = 0.5$  and  $pr(X_2 = 1) = 0.5$  for 1:1 matched study with  $n=200, 1000$  simulations.

|                                                        | CCA   |       | MI    |       | EM    |       | LLMI  |       | LCMI-2 |       | LCMI-3 |       |
|--------------------------------------------------------|-------|-------|-------|-------|-------|-------|-------|-------|--------|-------|--------|-------|
|                                                        | 95CI  | TE    | 95CI  | TE    | 95CI  | TE    | 95CI  | TE    | 95CI   | TE    | 95CI   | TE    |
| Pr(Missing=10%)                                        |       |       |       |       |       |       |       |       |        |       |        |       |
| MCAR $\mathcal{L}$                                     | 0.970 | 0.030 | 0.942 | 0.058 | 0.926 | 0.074 | 0.942 | 0.058 | 0.952  | 0.048 | 0.956  | 0.044 |
| MAR(Y) $\#$                                            | 0.960 | 0.040 | 0.952 | 0.048 | 0.922 | 0.078 | 0.952 | 0.048 | 0.948  | 0.052 | 0.960  | 0.040 |
| MAR(X2) $\flat$                                        | 0.960 | 0.040 | 0.952 | 0.048 | 0.930 | 0.070 | 0.952 | 0.048 | 0.956  | 0.044 | 0.960  | 0.040 |
| MAR(Y,X2) $\dagger$                                    | 0.972 | 0.028 | 0.954 | 0.046 | 0.920 | 0.080 | 0.954 | 0.046 | 0.960  | 0.040 | 0.960  | 0.040 |
| MNAR(X1) $\ddagger$                                    | 0.956 | 0.044 | 0.960 | 0.040 | 0.946 | 0.054 | 0.960 | 0.040 | 0.948  | 0.052 | 0.950  | 0.050 |
| MNAR(X1,X2) $\natural$                                 | 0.948 | 0.052 | 0.966 | 0.034 | 0.954 | 0.046 | 0.966 | 0.034 | 0.970  | 0.030 | 0.962  | 0.038 |
| MNAR(X1,Y) $\S$                                        | 0.964 | 0.036 | 0.958 | 0.042 | 0.944 | 0.056 | 0.958 | 0.042 | 0.956  | 0.044 | 0.954  | 0.046 |
| Pr(Missing=30%)                                        |       |       |       |       |       |       |       |       |        |       |        |       |
| MCAR $\mathcal{L}$                                     | 0.952 | 0.048 | 0.938 | 0.062 | 0.842 | 0.158 | 0.938 | 0.062 | 0.940  | 0.060 | 0.960  | 0.040 |
| MAR(Y) $\#$                                            | 0.952 | 0.048 | 0.956 | 0.044 | 0.820 | 0.180 | 0.956 | 0.044 | 0.946  | 0.054 | 0.958  | 0.042 |
| MAR(X2) $\flat$                                        | 0.964 | 0.036 | 0.956 | 0.044 | 0.854 | 0.146 | 0.956 | 0.044 | 0.938  | 0.062 | 0.956  | 0.044 |
| MAR(Y,X2) $\dagger$                                    | 0.962 | 0.038 | 0.940 | 0.060 | 0.822 | 0.178 | 0.940 | 0.060 | 0.944  | 0.056 | 0.972  | 0.028 |
| MNAR(X1) $\ddagger$                                    | 0.950 | 0.050 | 0.932 | 0.068 | 0.866 | 0.134 | 0.932 | 0.068 | 0.944  | 0.056 | 0.954  | 0.046 |
| MNAR(X1,X2) $\natural$                                 | 0.942 | 0.058 | 0.958 | 0.042 | 0.850 | 0.150 | 0.958 | 0.042 | 0.948  | 0.052 | 0.962  | 0.038 |
| MNAR(X1,Y) $\S$                                        | 0.930 | 0.070 | 0.938 | 0.062 | 0.820 | 0.180 | 0.938 | 0.062 | 0.926  | 0.074 | 0.968  | 0.032 |
| Pr(Missing=50%)                                        |       |       |       |       |       |       |       |       |        |       |        |       |
| MCAR $\mathcal{L}$                                     | 0.930 | 0.070 | 0.930 | 0.070 | 0.760 | 0.240 | 0.930 | 0.070 | 0.950  | 0.050 | 0.950  | 0.050 |
| MAR(Y) $\#$                                            | 0.960 | 0.040 | 0.940 | 0.060 | 0.690 | 0.310 | 0.940 | 0.060 | 0.950  | 0.050 | 0.970  | 0.030 |
| MAR(X2) $\flat$                                        | 0.960 | 0.040 | 0.960 | 0.310 | 0.930 | 0.070 | 0.930 | 0.070 | 0.940  | 0.060 | 0.960  | 0.040 |
| MAR(Y,X2) $\dagger$                                    | 0.940 | 0.060 | 0.940 | 0.060 | 0.710 | 0.290 | 0.940 | 0.060 | 0.930  | 0.070 | 0.970  | 0.030 |
| MNAR(X1) $\ddagger$                                    | 0.950 | 0.050 | 0.940 | 0.060 | 0.760 | 0.240 | 0.940 | 0.060 | 0.940  | 0.060 | 0.960  | 0.040 |
| MNAR(X1,X2) $\natural$                                 | 0.940 | 0.060 | 0.940 | 0.060 | 0.740 | 0.260 | 0.940 | 0.060 | 0.930  | 0.070 | 0.960  | 0.040 |
| MNAR(X1,Y) $\S$                                        | 0.950 | 0.050 | 0.930 | 0.070 | 0.740 | 0.260 | 0.930 | 0.070 | 0.920  | 0.080 | 0.960  | 0.040 |
| $\mathcal{L}$ missing completely at random             |       |       |       |       |       |       |       |       |        |       |        |       |
| $\#$ missing at random conditional on Y                |       |       |       |       |       |       |       |       |        |       |        |       |
| $\flat$ missing at random conditional on X2            |       |       |       |       |       |       |       |       |        |       |        |       |
| $\dagger$ missing at random conditional on Y, X2       |       |       |       |       |       |       |       |       |        |       |        |       |
| $\ddagger$ missing not at random conditional on X1     |       |       |       |       |       |       |       |       |        |       |        |       |
| $\natural$ missing not at random conditional on X1, X2 |       |       |       |       |       |       |       |       |        |       |        |       |
| $\S$ missing not at random conditional on X1, Y        |       |       |       |       |       |       |       |       |        |       |        |       |
